# Supplementary material for: Development of different deep eutectic solvent aqueous biphasic systems for the separation of proteins
Source: Royal Society of Chemistry journal article supplement (doi:10.1039/c9ra00519f), 2019-01-01
Supplement: c9ra00519f1.pdf [file c9ra00519f1.pdf]

1

## Electronic Supplementary Material

2

3 **Development of different deep eutectic solvents aqueous biphasic systems for the**  
4 **separation of protein**

5

6 **Jiaojiao Meng<sup>a</sup>, Yuzhi Wang<sup>a\*</sup>, Yigang Zhou<sup>b\*</sup>, Jing Chen<sup>a</sup>, Xiaoxiao Wei<sup>a</sup>,**  
7 **Rui Ni<sup>a</sup>, Ziwei Liu<sup>a</sup>, Fangting Xu<sup>a</sup>**

8

9 *<sup>a</sup> State Key Laboratory of Chemo/Biosensing and Chemometrics, College of*  
10 *Chemistry and Chemical Engineering, Hunan University, Changsha, 410082, P.R.*  
11 *China*

12 *<sup>b</sup> Department of Microbiology, College of Basic Medicine, Central South University,*  
13 *Changsha, 410083, P.R. China*

14

15 *\*Corresponding author: Professor Yuzhi Wang; Associate professor Yigang Zhou*

16 **Table S1** Elemental analysis of bottom phase after extraction.

| Element           | C      | H       | O      | N       | Cl       | Cl (in theory) |
|-------------------|--------|---------|--------|---------|----------|----------------|
| Content<br>(g/mL) | 0.0110 | 0.00292 | 0.0324 | 0.00171 | 0.000672 | 0.0109         |
| Content<br>(%)    | 22.850 | 6.150   | 67.350 | 3.570   | 0.08     | 1.31           |

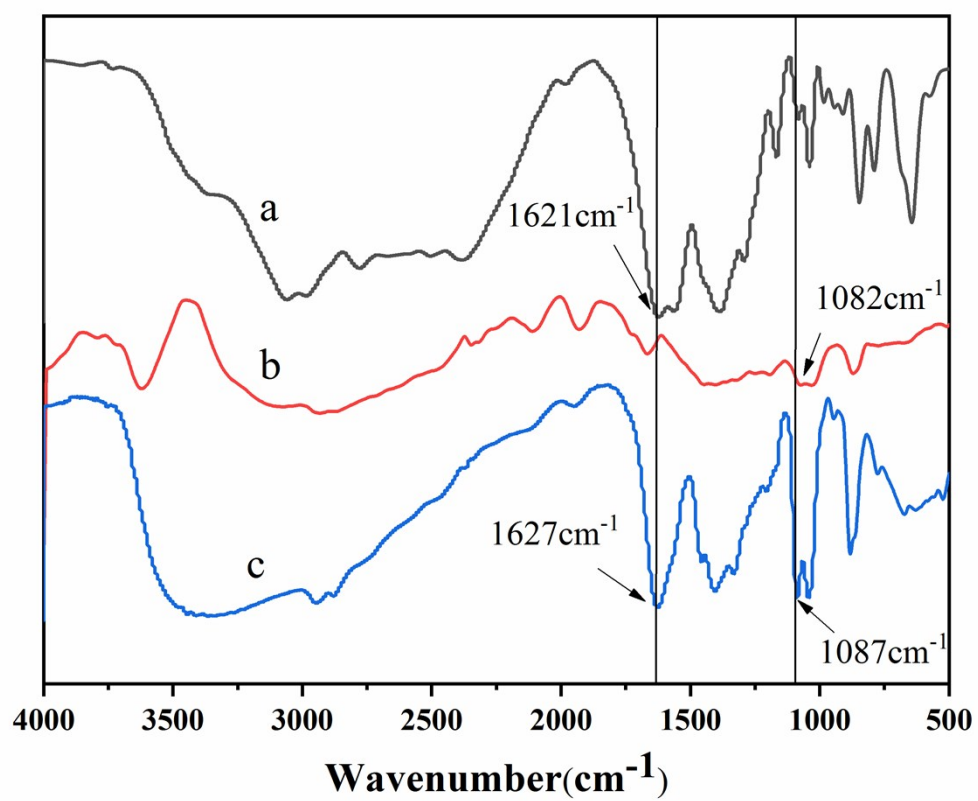

**Fig. S1** FT-IR spectra of DES and individual components: (a) L-proline; (b) ethylene glycol; (c) [Pro][EG];

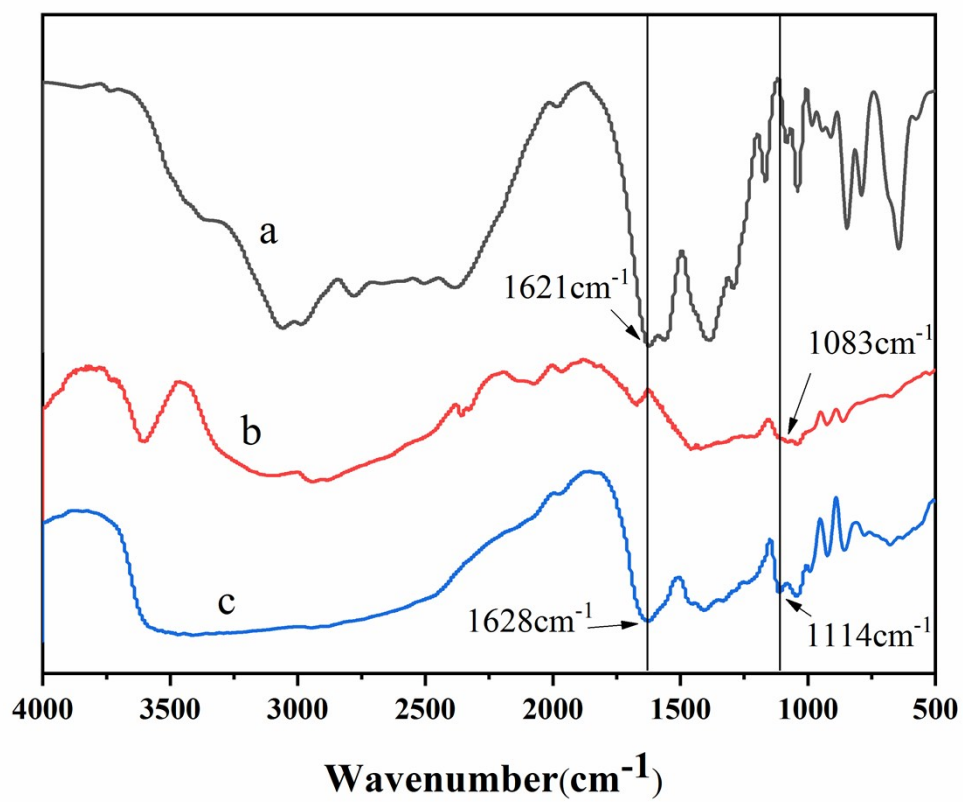

21 **Fig. S2** FT-IR spectra of DES and individual components: (a) L-proline; (b) glycerol;

22 (c) [Pro][G];

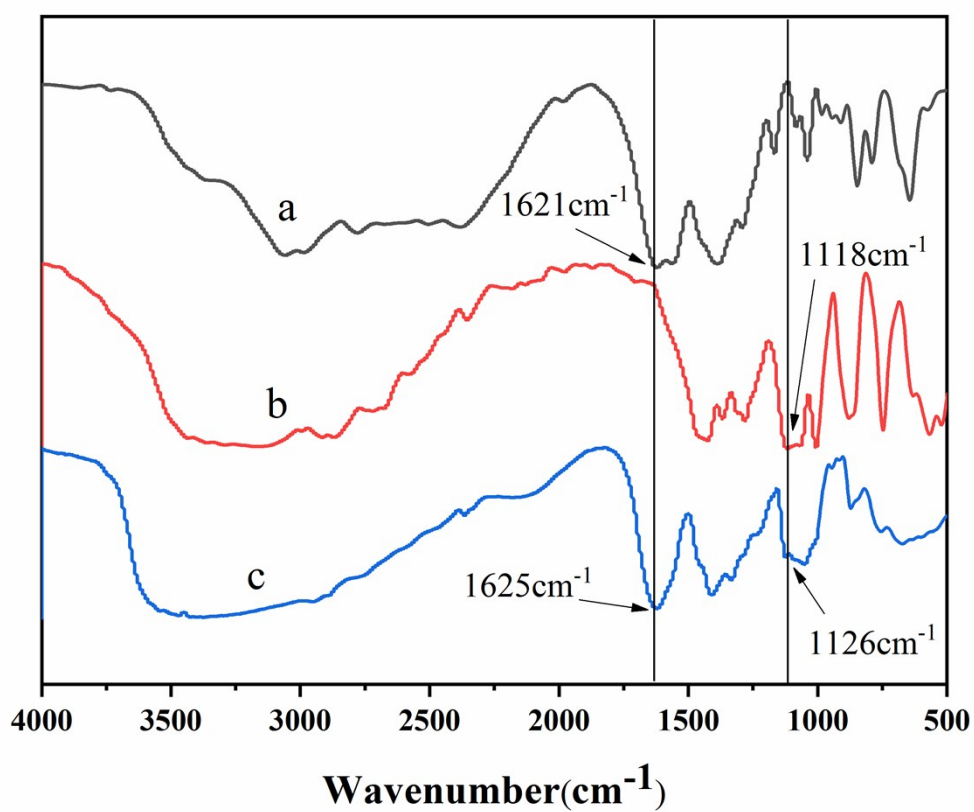

23 **Fig. S3** FT-IR spectra of DES and individual components: (a) L-proline; (b) xylitol; (c)

24 [Pro][Xyl];

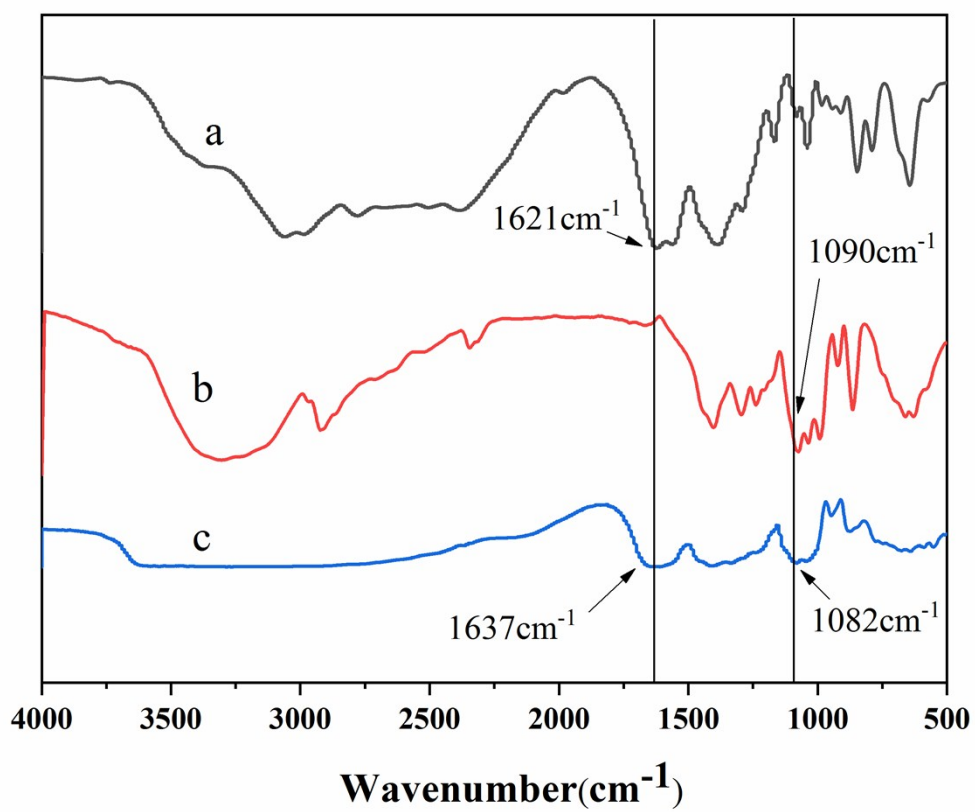

25 **Fig. S4** FT-IR spectra of DES and individual components: (a) L-proline; (b) D-  
26 sorbitol; (c) [Pro][Sor];

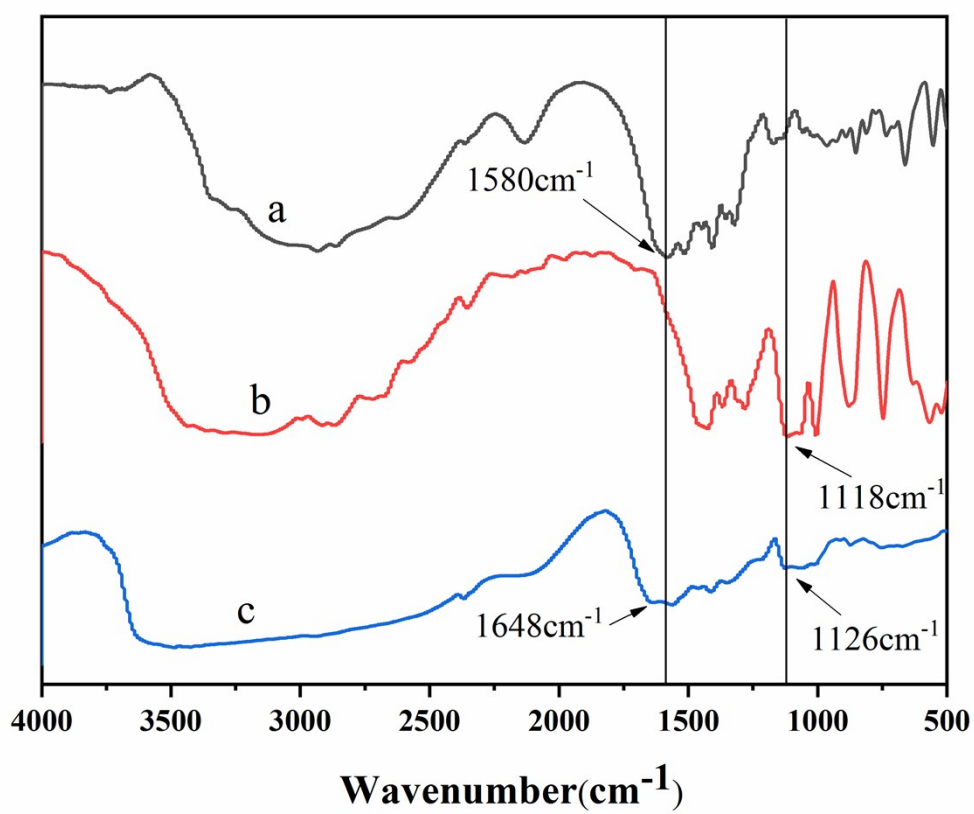

27 **Fig. S5** FT-IR spectra of DES and individual components: (a) lysine; (b) xylitol; (c)

28 [Lys][Xyl];

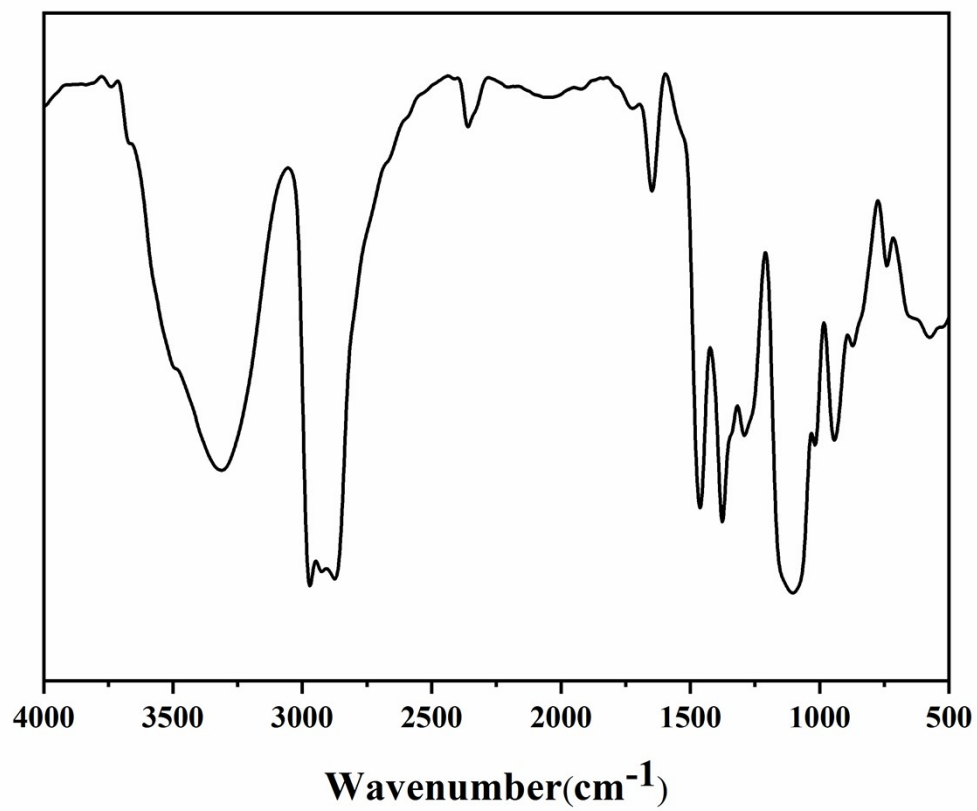

29 **Fig. S6** FT-IR spectra of [TBAC][PPG400] DES;



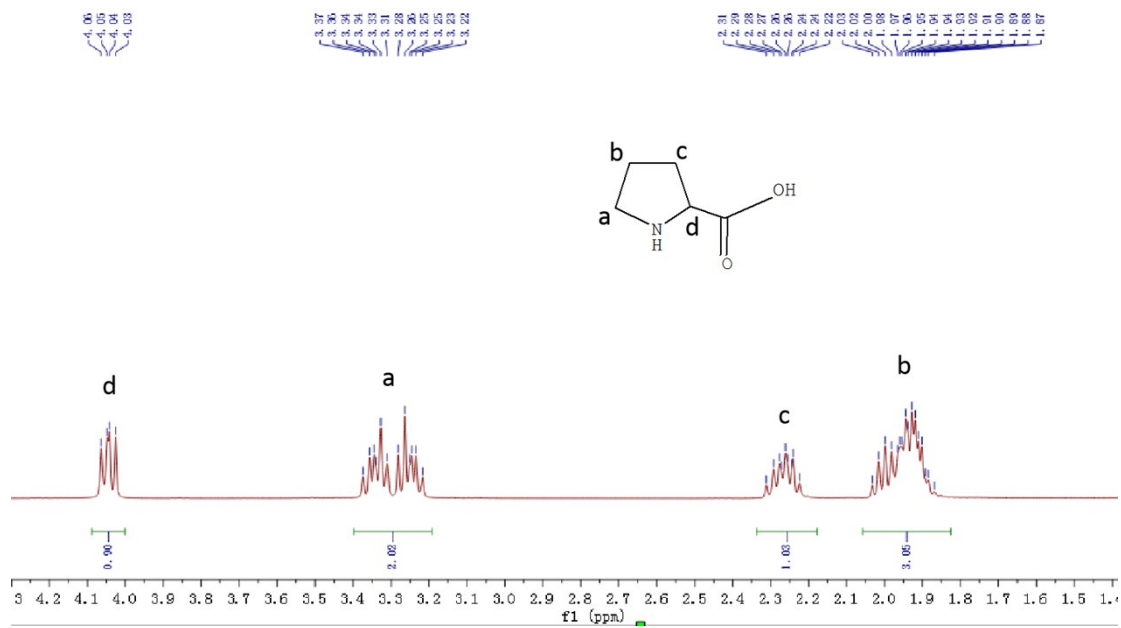

30 **Fig. S7**  $^1\text{H}$  NMR spectra of L-proline.

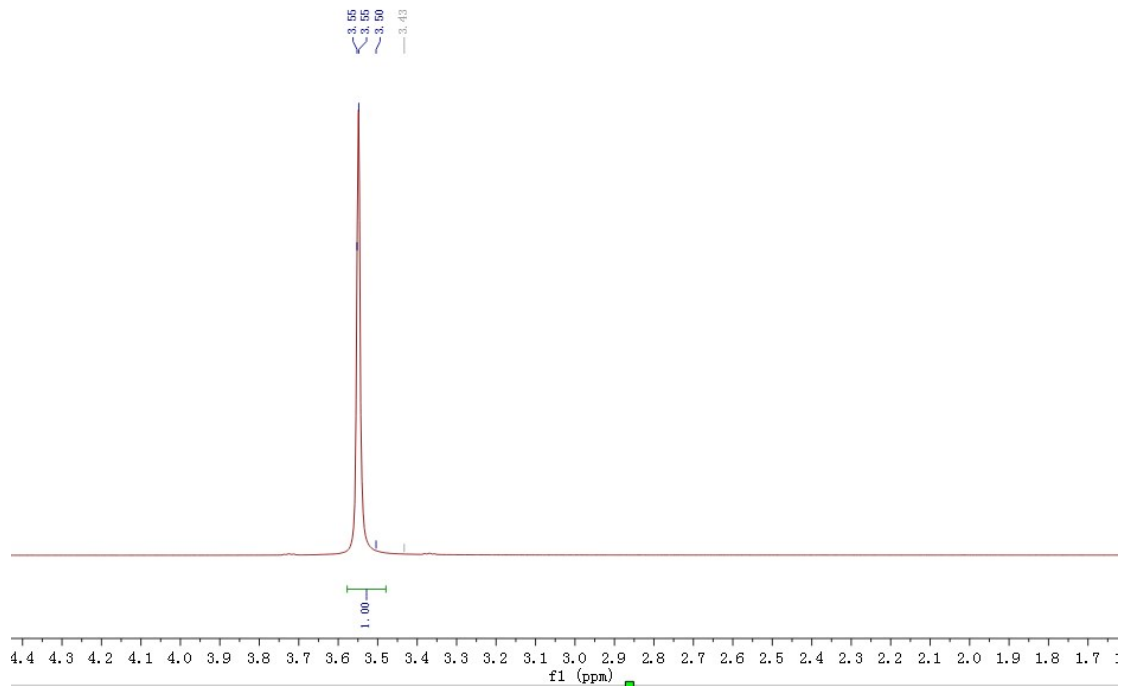

31 **Fig. S8**  $^1\text{H}$  NMR spectra of ethylene glycol.

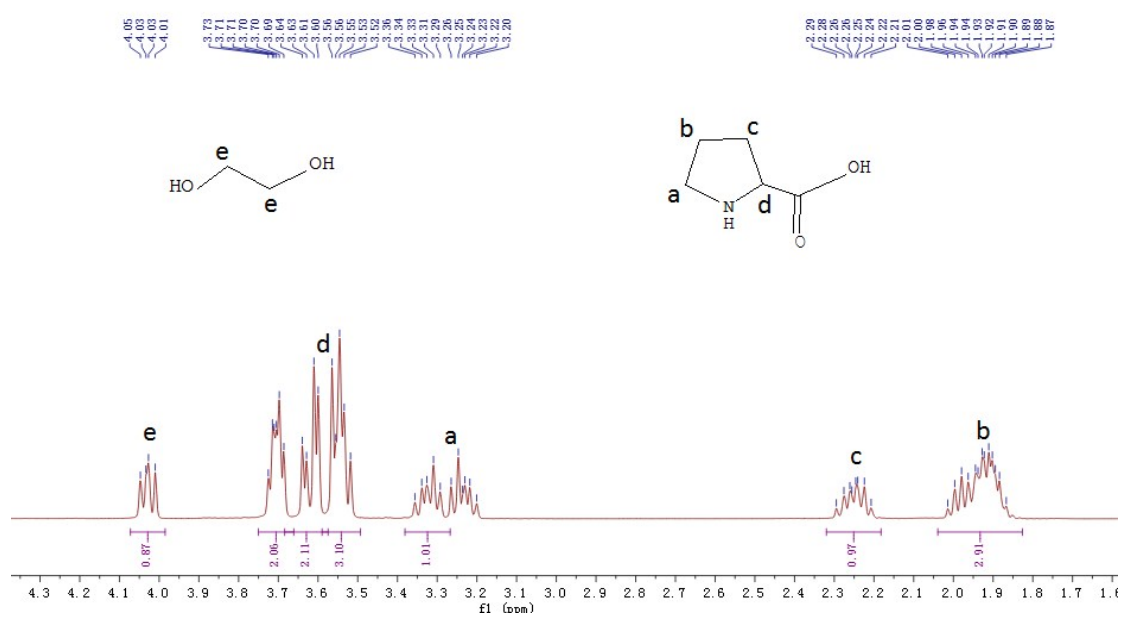

32 **Fig. S9** <sup>1</sup>H NMR spectra of [Pro][EG].

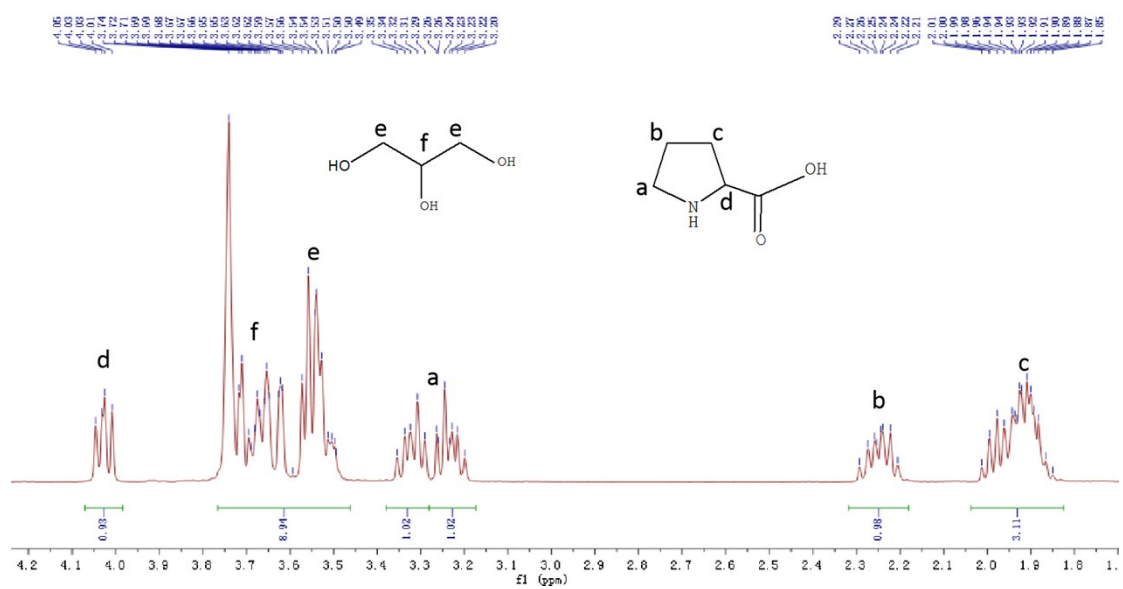

33 **Fig. S10** <sup>1</sup>H NMR spectra of [Pro][G].

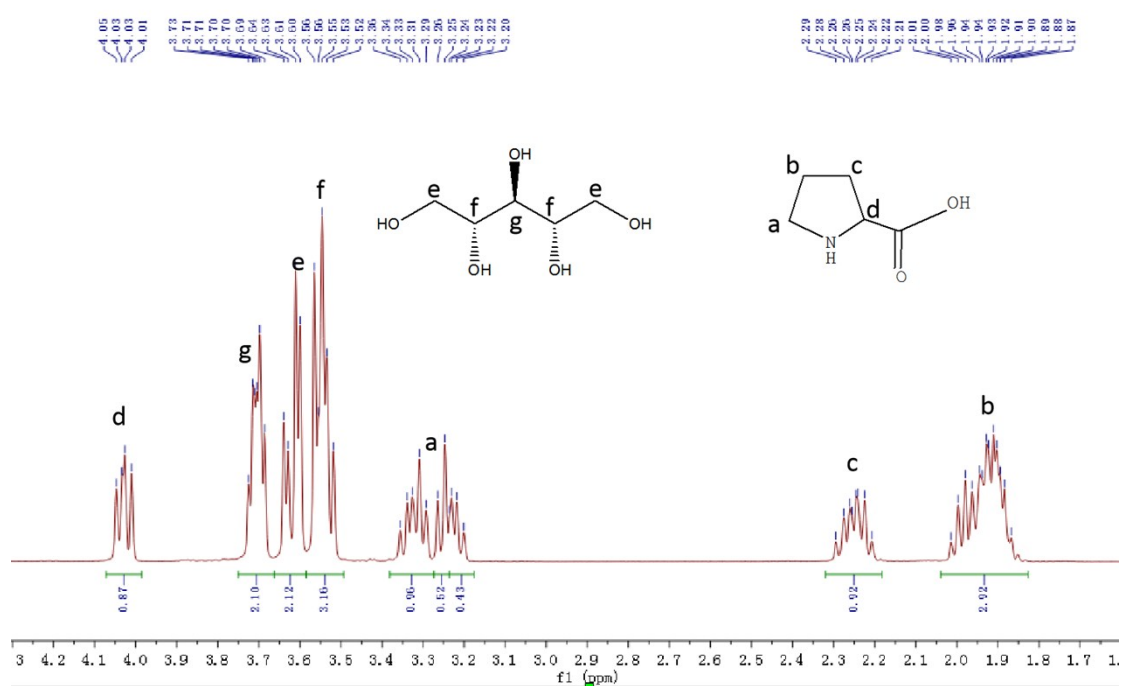

34 **Fig. S11** <sup>1</sup>H NMR spectra of [Pro][Xyl].

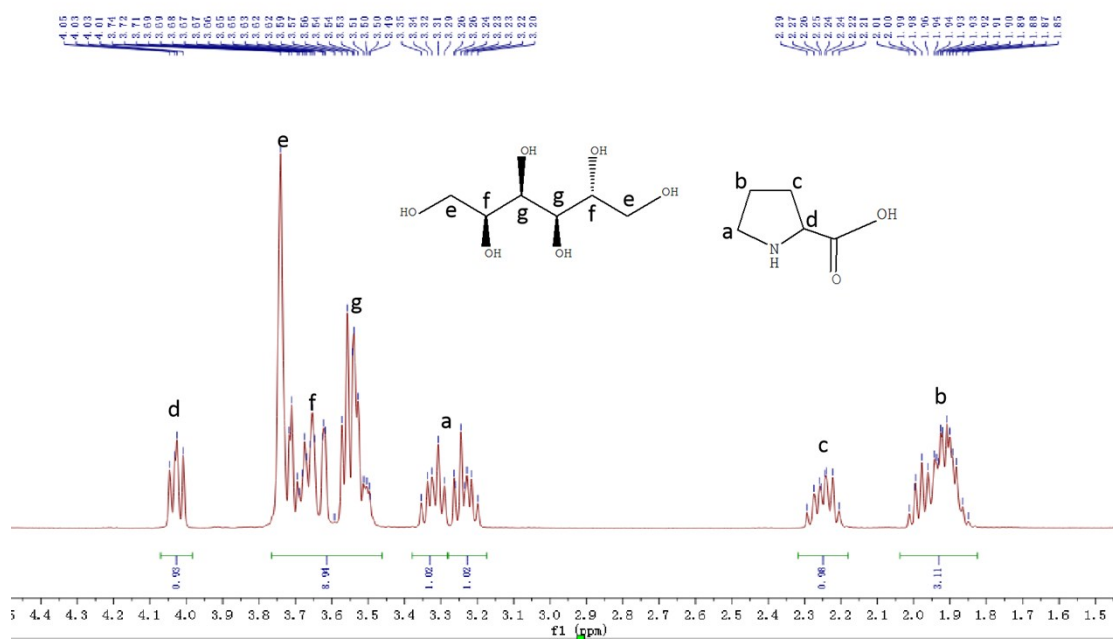

35 **Fig. S12** <sup>1</sup>H NMR spectra of [Pro][Sor].

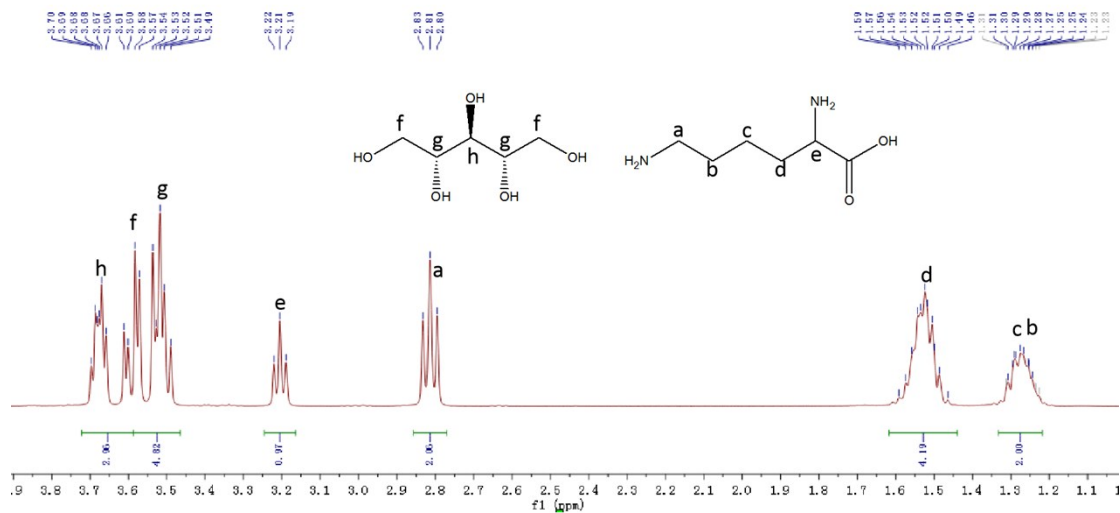

36 Fig. S13  $^1\text{H}$  NMR spectra of [Lys][Xyl].

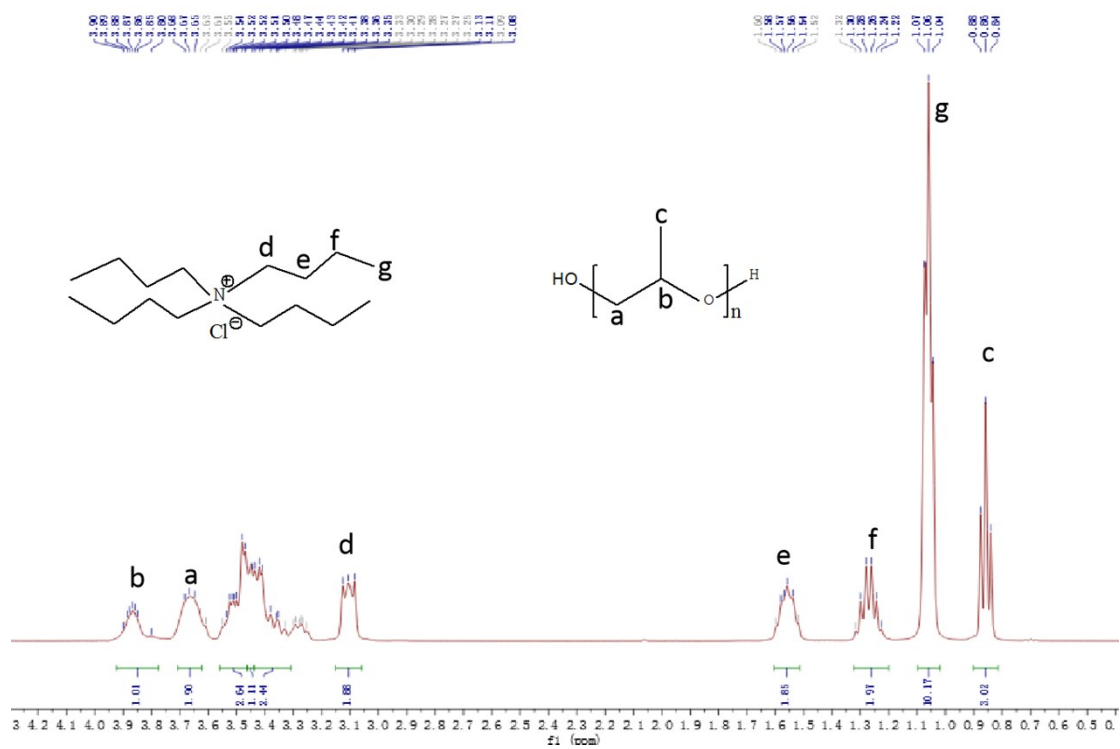

37 Fig. S14  $^1\text{H}$  NMR spectra of [TBAC][PPG400].
